# Supplementary material for: Digoxin Derivatives Sensitize a Saccharomyces cerevisiae Mutant Strain to Fluconazole by Inhibiting Pdr5p
Source: MDPI journal article supplement (doi:10.3390/jof8080769), 2022-07-25
Supplement: s1 [file s1]

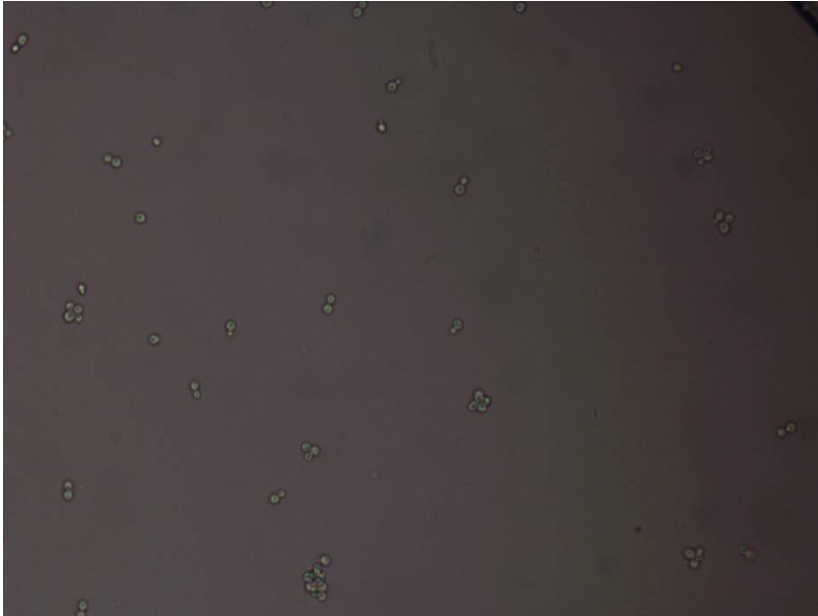

S1. AD/124567 without treatment and with glucose (bright field).

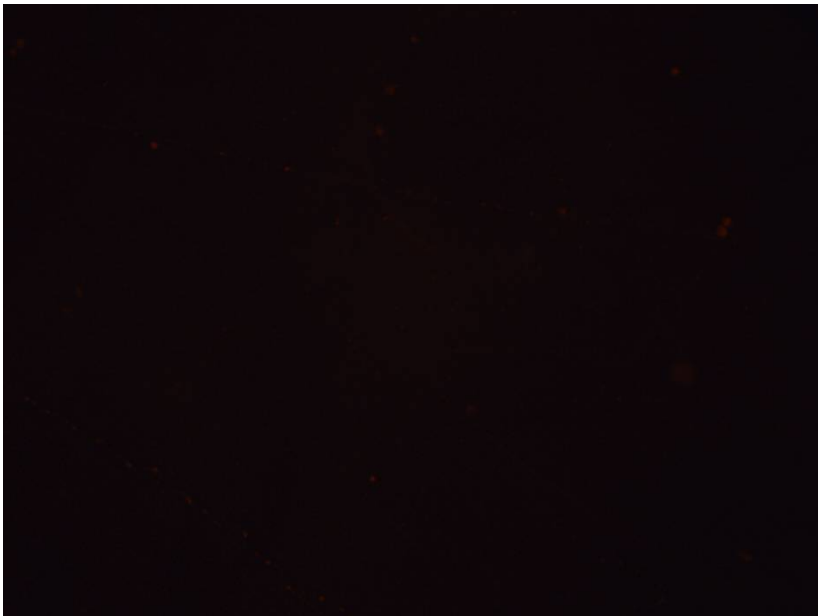

S2. AD/124567 without treatment and with glucose (fluorescence).

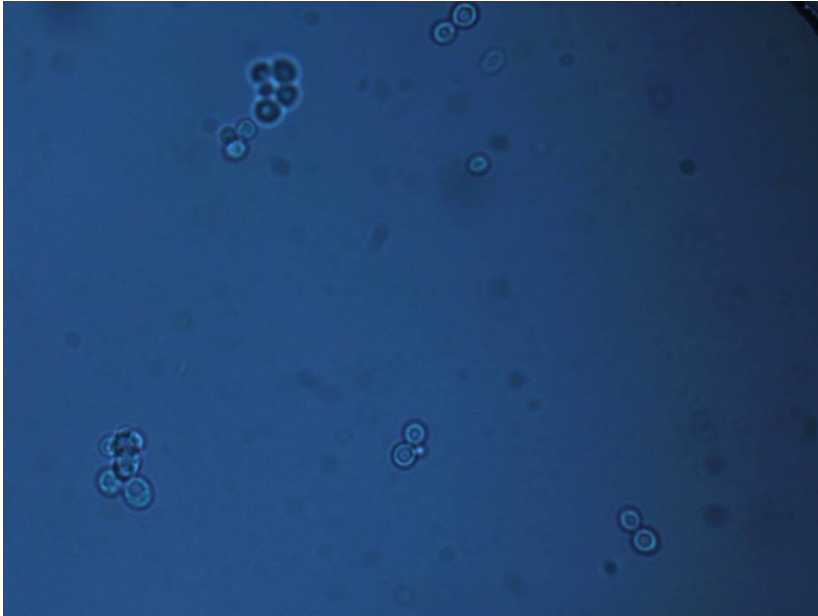

S3. AD/124567 without treatment and without glucose (bright field).

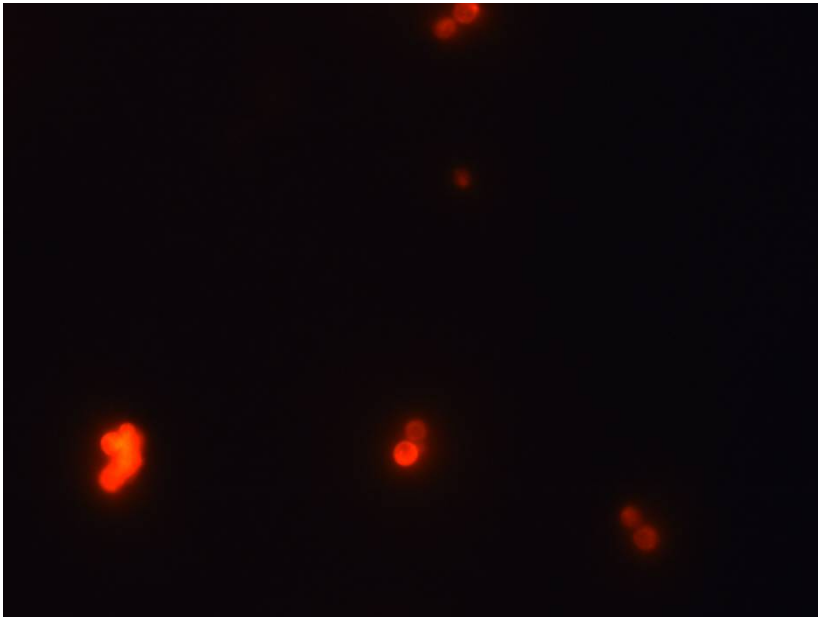

S4. AD/124567 without treatment and without glucose (fluorescence).

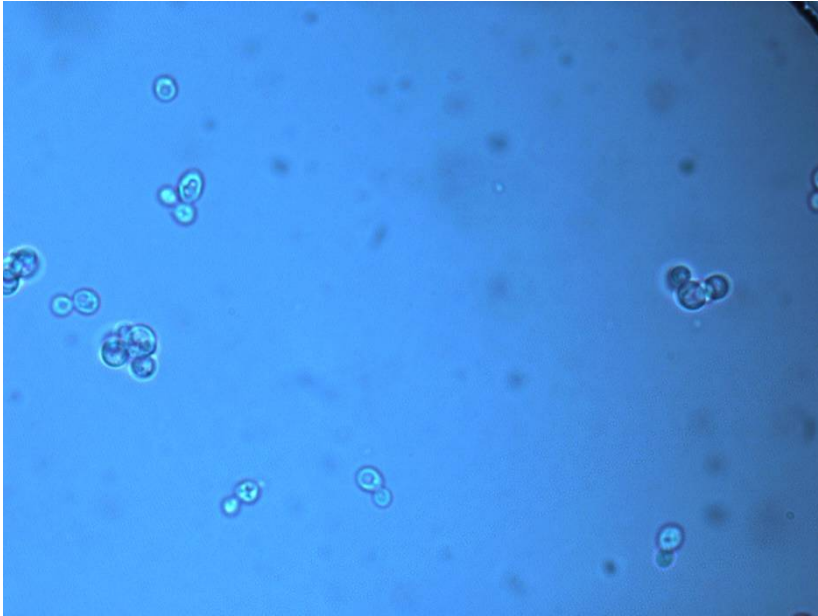

S5. AD/1234567 without treatment and with glucose (bright field).

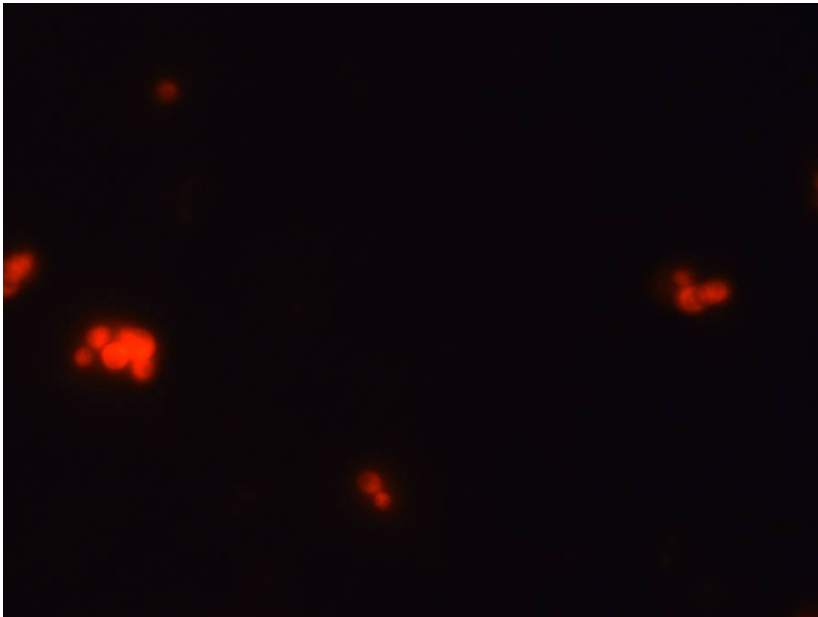

S6. AD/1234567 without treatment and with glucose (fluorescence).

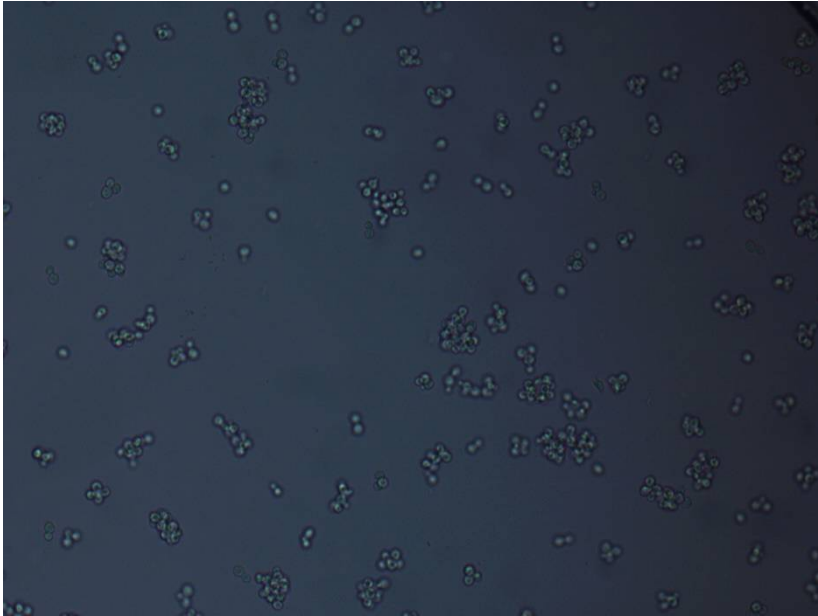

S7. AD/124567 + DGB1 (bright field).

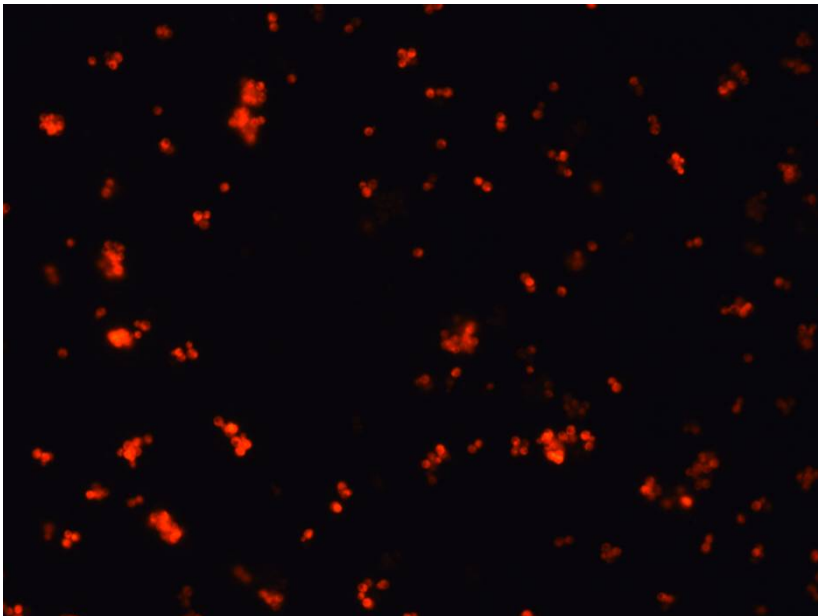

S8. AD/124567 + DGB1 (fluorescence).

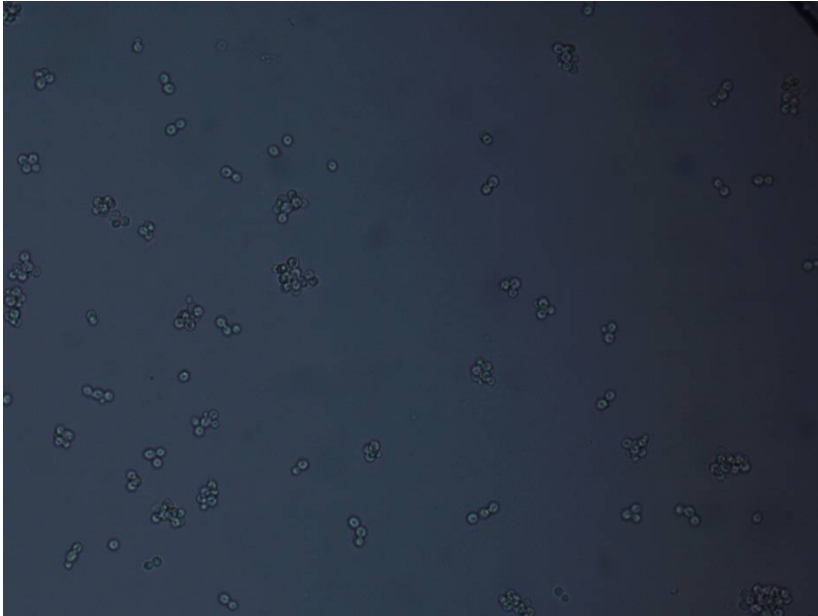

S9. AD/124567 + DGB2 (bright field).

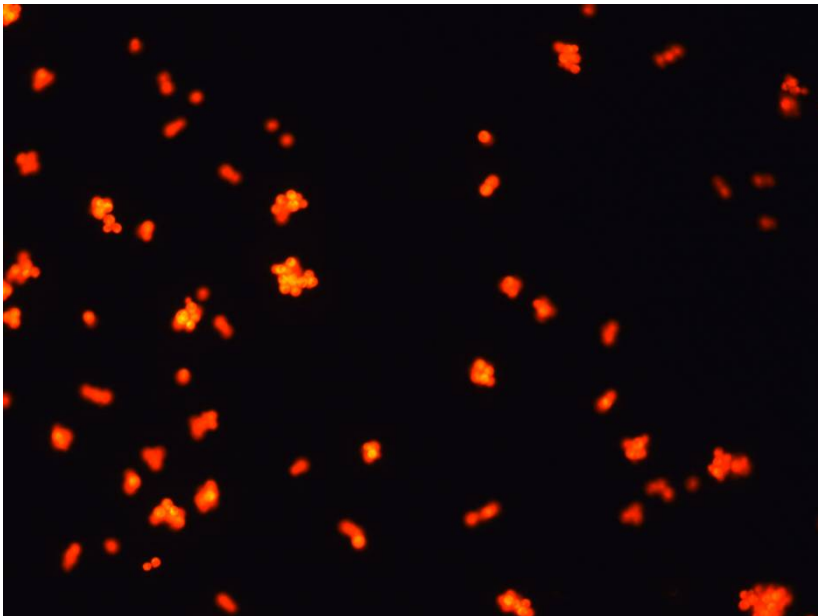

S10. AD/124567 + DGB2 (fluorescence).

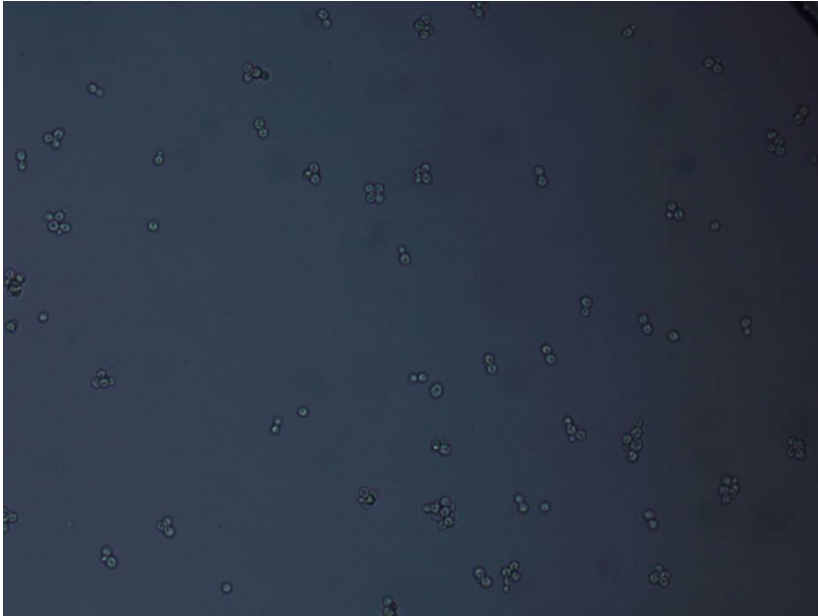

S11. AD/124567 + DGB3 (bright field).

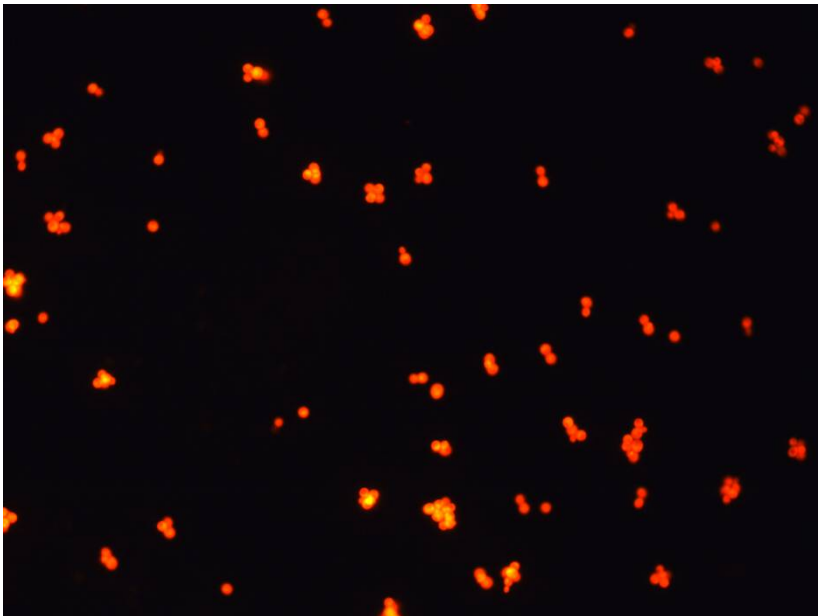

S12. AD/124567 + DGB3 (fluorescence).

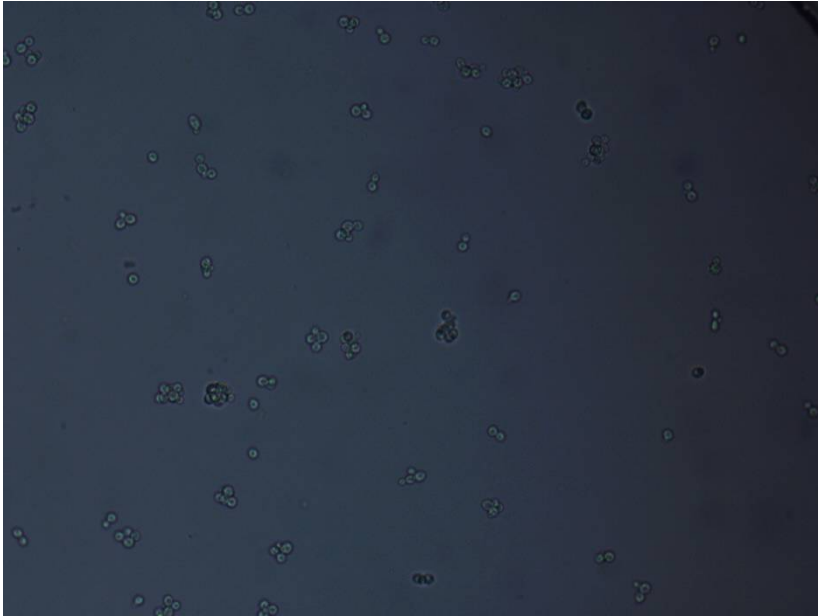

S13. AD/124567 + DGB4 (bright field).

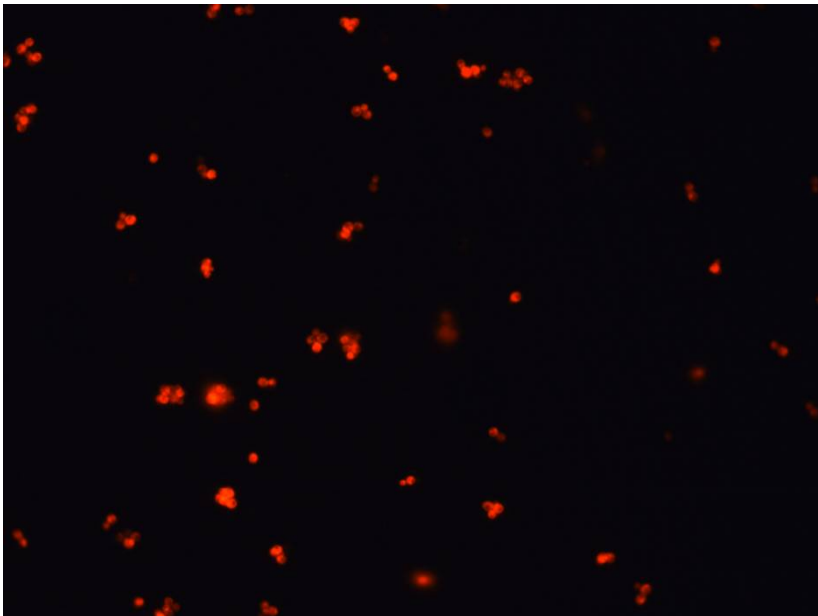

S14. AD/124567 + DGB4 (fluorescence).

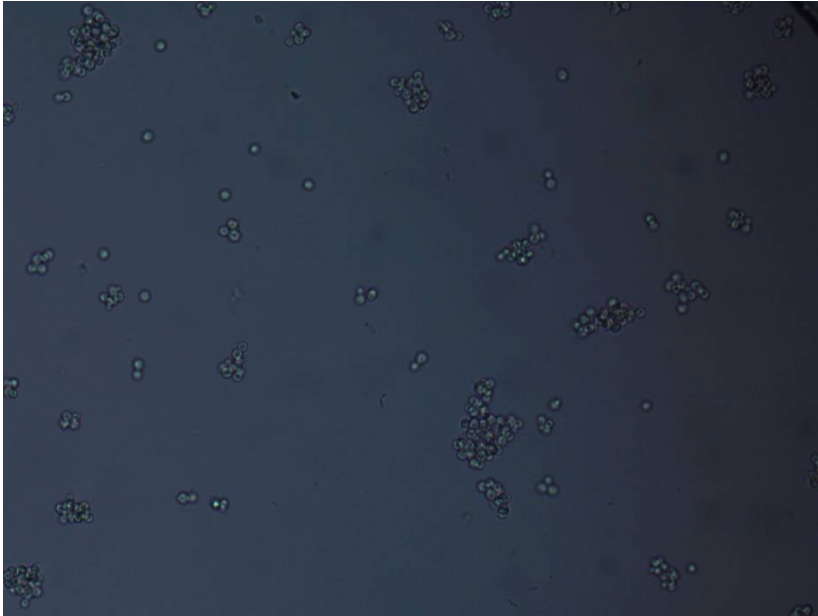

S15. AD/124567 + DGB5 (bright field).

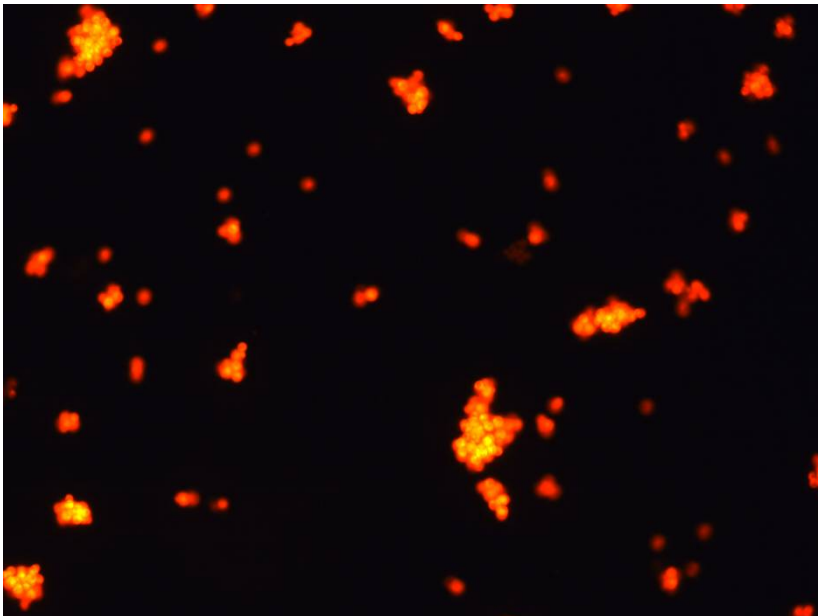

S16. AD/124567 + DGB5 (fluorescence).



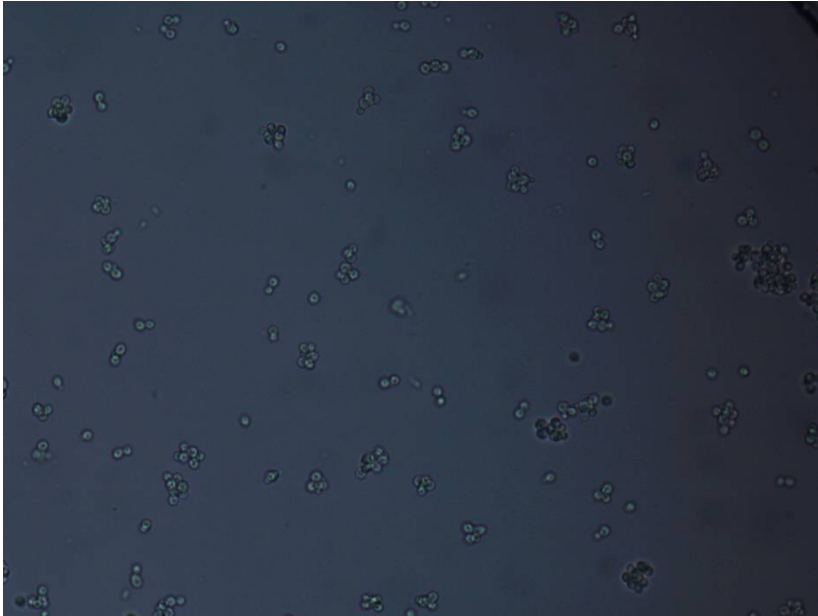

S17. AD/124567 + DGB6 (bright field).

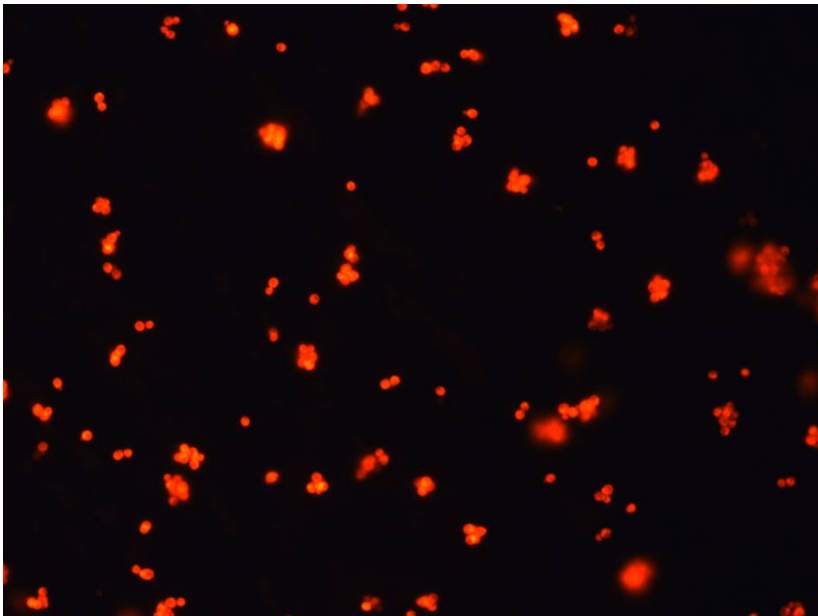

S18. AD/124567 + DGB6 (fluorescence).

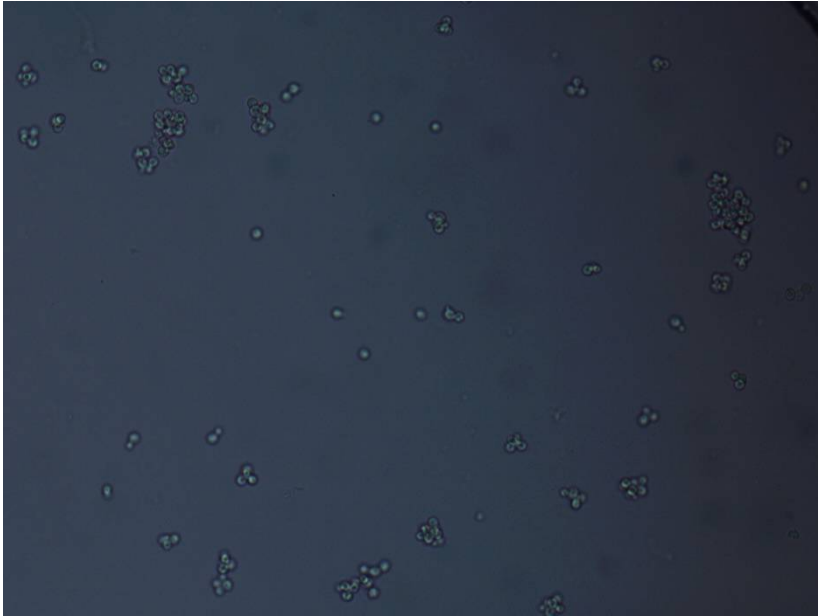

S19. AD/124567 + DGB7 (bright field).

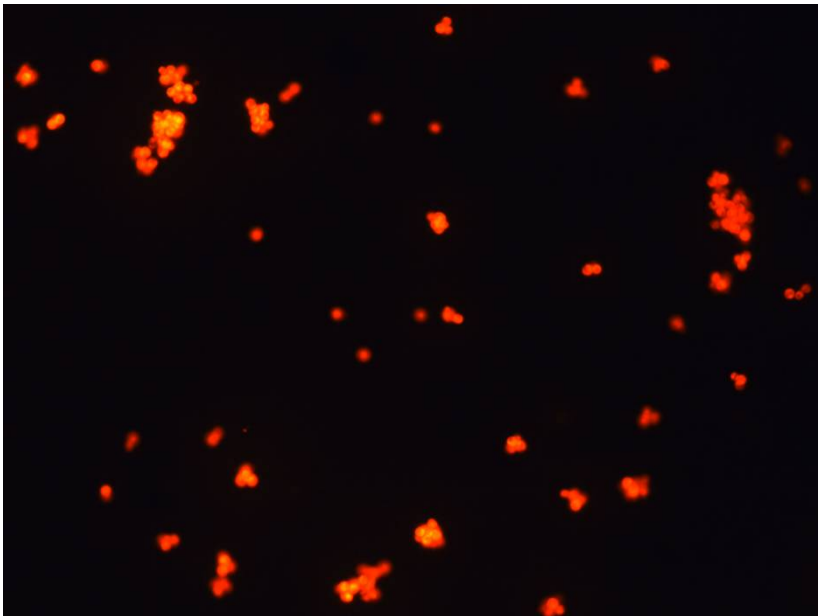

S20. AD/124567 + DGB7 (fluorescence).

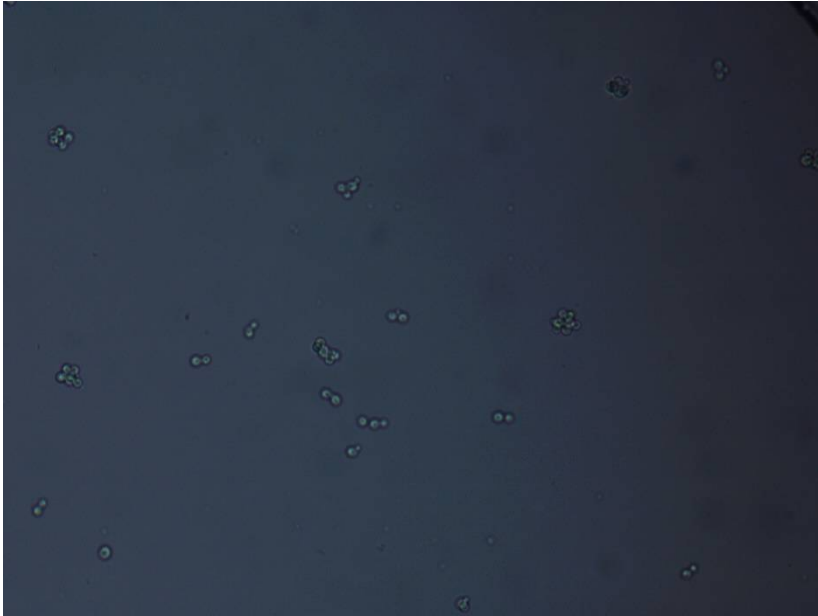

S21. AD/124567 + digoxin (bright field).

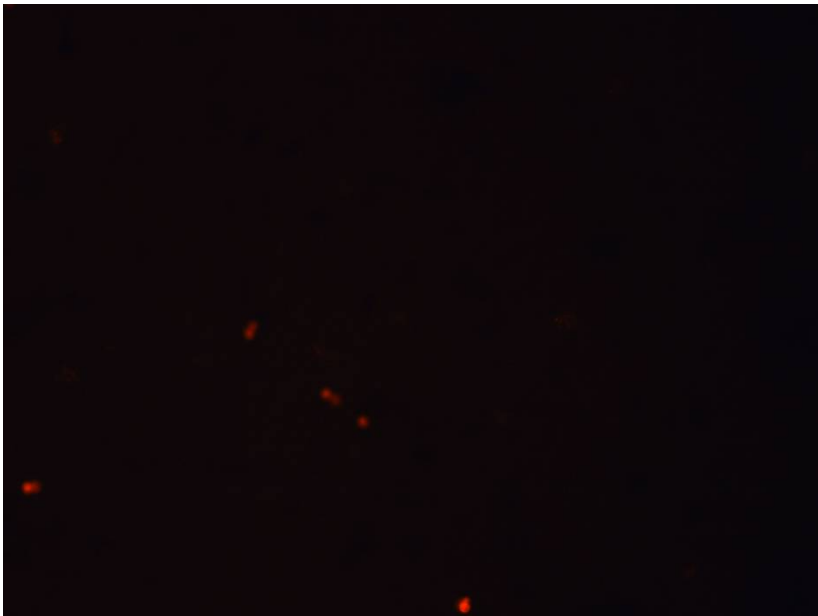

S22. AD/124567 + digoxin (fluorescence).
